# Supplementary material for: The transcriptional repressor complex FRS7-FRS12 regulates flowering time and growth in Arabidopsis
Source: PubMed Central journal article supplement (PMC5437275; doi:10.1038/ncomms15235), 2017-05-11
Supplement: ncomms15235-s1.pdf [file ncomms15235-s1.pdf]

## Supplementary Information

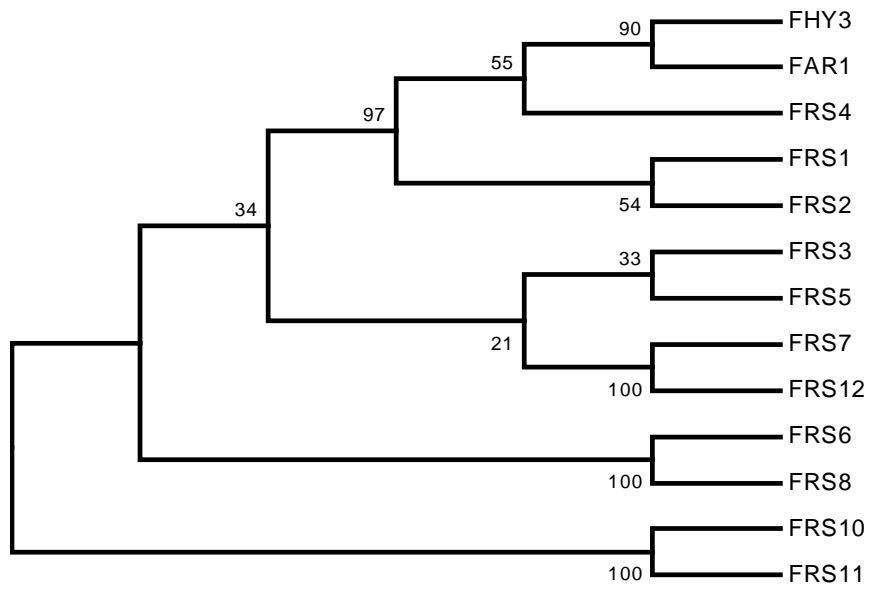

**Supplementary Figure 1. The FRS family.** Maximum-likelihood phylogenetic tree of the FAR1 RELATED SEQUENCE (FRS) family. Numbers above the branches represent bootstrap values.

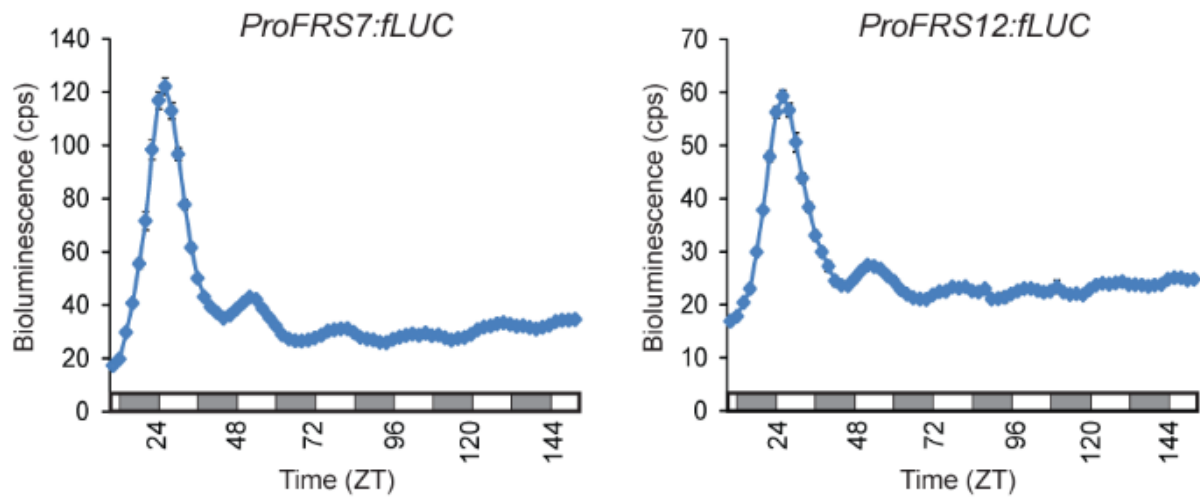

**Supplementary Figure 2. Biological repeat of the circadian bioluminescence expression analysis of *FRS7* and *FRS12*.** The experiment was conducted as described in the legend of Fig. 1a. Data represent the mean  $\pm$  SEM (n = 6, corresponding to 6 wells of protoplasts that were imaged and averaged for each time point of the figure). White and gray regions indicate subjective light and dark period, respectively.

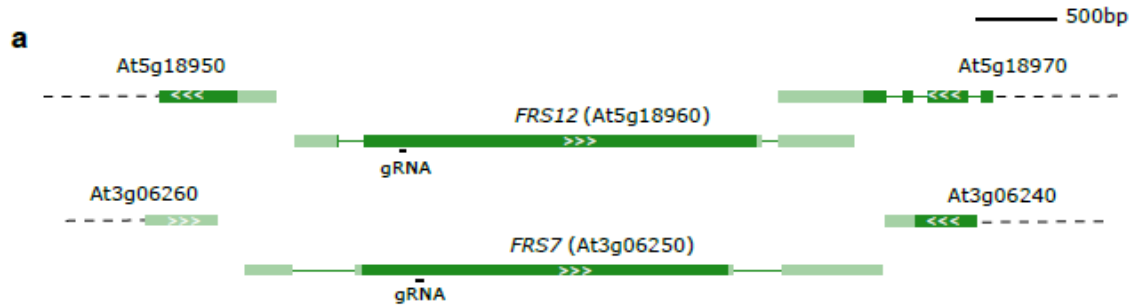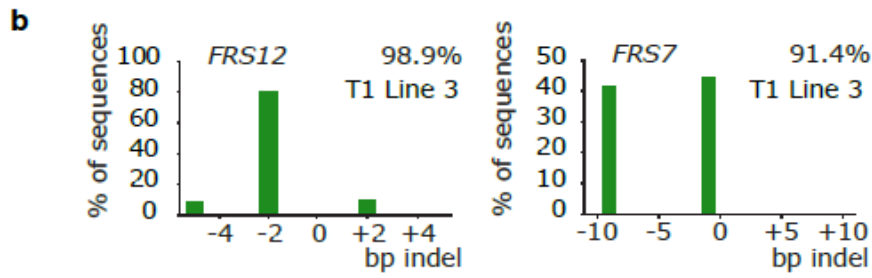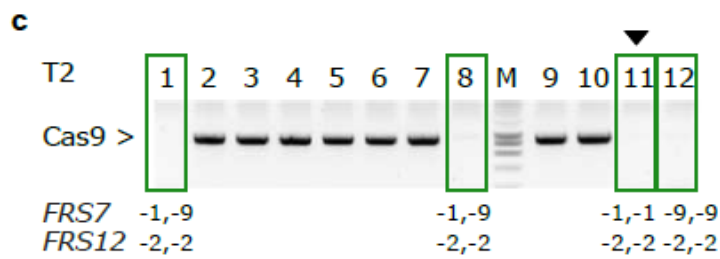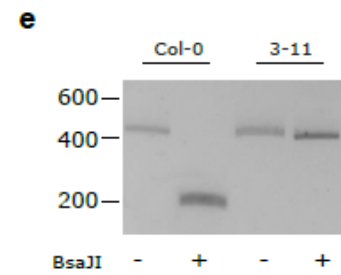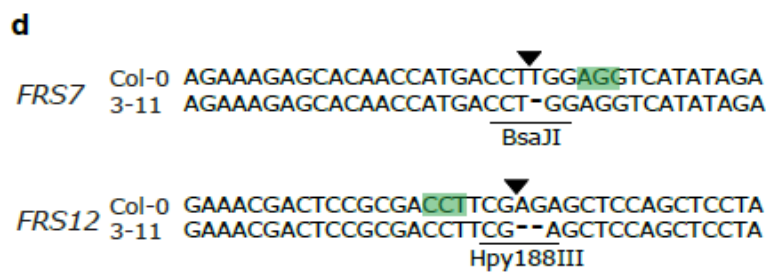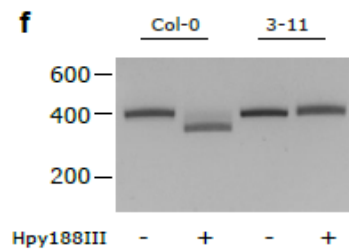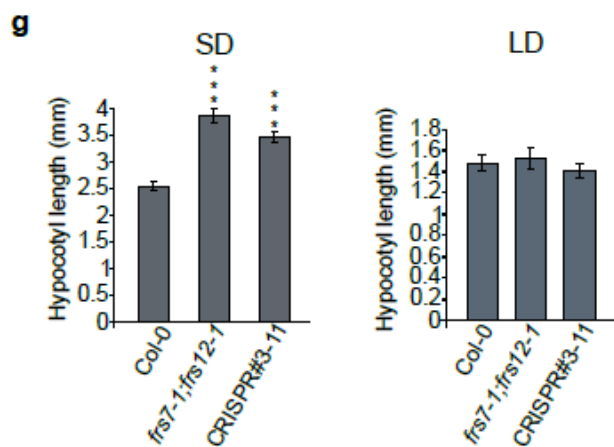

**Supplementary Figure 3. CRISPR/Cas9-mediated knock-out of *FRS7* and *FRS12*.** **a**, genomic structure of the targeted genes and location of the sgRNAs. Dark green boxes designate exons; light green boxes, UTRs; solid lines, introns; arrows, gene orientation. **b**, TIDE analysis. Genomic DNA of a chimeric T1 plant (Line 3) was PCR amplified, sequenced by standard capillary electrophoresis and analyzed using TIDE. The indel spectrum is visualized with an estimated overall efficiency and frequency of each indel. **c**, PCR amplification of the Cas9 transgene. Null segregants are boxed and the continued plant marked with a triangle. TIDE estimated genotypes for *FRS7* and *FRS12* are given for the null segregants. **d**, Sequence alignment of the targeted loci for Col-0 and (Line 3, plant 11). PAM is highlighted and the Cas9 cut site is indicated with a triangle. Deleted bases are replaced by a dash. Restriction enzyme recognition sites overlapping the Cas9 cut site are underlined. **e and f**, Cleaved Amplified Polymorphic Sequences (CAPS) assay. Genomic DNA of Col-0 and T3 CRISPR #3-11 plants was used to amplify the genomic region spanning the mutation. PCR products were subsequently digested with the indicated restriction enzymes or mock digested. **g**, Hypocotyl length measurements of *Arabidopsis* Col-0 wt seedlings compared to loss-of-function *FRS7 FRS12* T-DNA line and T3 CRISPR #3-11 line. Seedlings were grown for 10 days under SD or LD conditions. Values represent the average of at least 24 biological replicates  $\pm$  SEM in SD and 15 in LD conditions (\*\*\*) $P < 0.001$ , t-test).

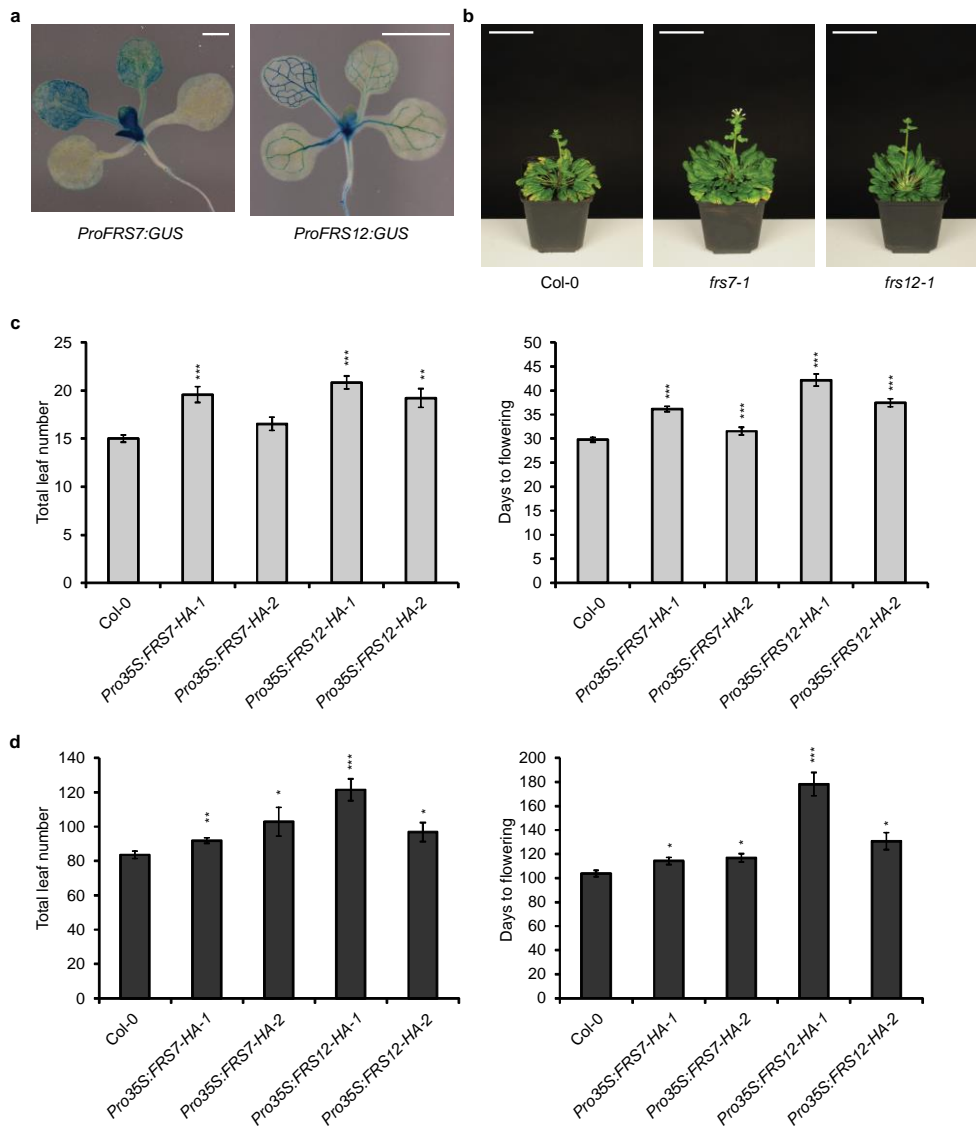

**Supplementary Figure 4. FRS7 and FRS12 are flowering time modulators.** **a**,  $\beta$ -Glucuronidase (GUS) histochemical analysis of the spatial expression of *FRS7* and *FRS12* in 14-day-old seedlings. Scale bars: 1 mm. **b**, Representative photographs comparing a SD-grown Col-0 wt flowering plant to the *frs7-1* and *frs12-1* single mutant lines. Scale bars: 5 cm. **c**, Flowering time measurements as total leaf number (left panel) and days to flower (right panel) of LD-grown Col-0 wt *Arabidopsis* plants compared to gain-of-function lines of *FRS7*, *FRS12*. **d**, Flowering time measurements as total leaf number (left panel) and days to flower (right panel) of SD-grown Col-0 wt *Arabidopsis* plants compared to gain-of-function lines of *FRS7*, *FRS12*. Values represent the average of 12 biological replicates  $\pm$  SEM; \* $P < 0.05$ , \*\* $P < 0.01$ , \*\*\* $P < 0.001$ , t-test.

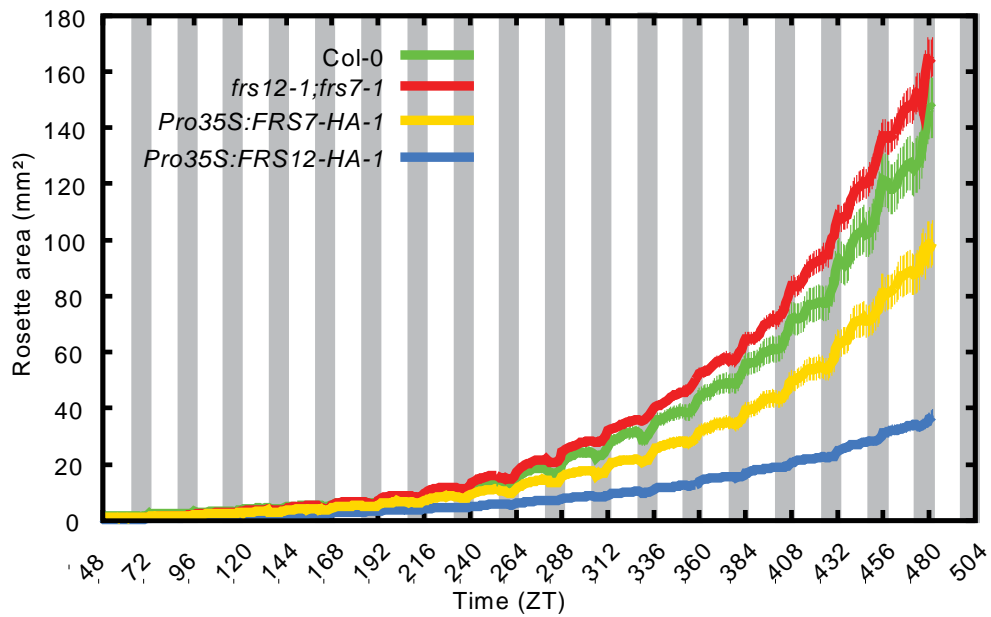

**Supplementary Figure 5. FRS7 and FRS12 modulate leaf-rosette growth.** Rosette leaf growth dynamics of LD-growing *Arabidopsis*. Col-0 wt seedlings were grown in parallel to the *frs7-1;frs12-1* double mutant and *Pro35S:FRS7-HA-1* and *Pro35S:FRS12-HA-1* overexpressing lines. Gray bands represent night periods. Values represent the average of 25 biological replicates  $\pm$  SEM.

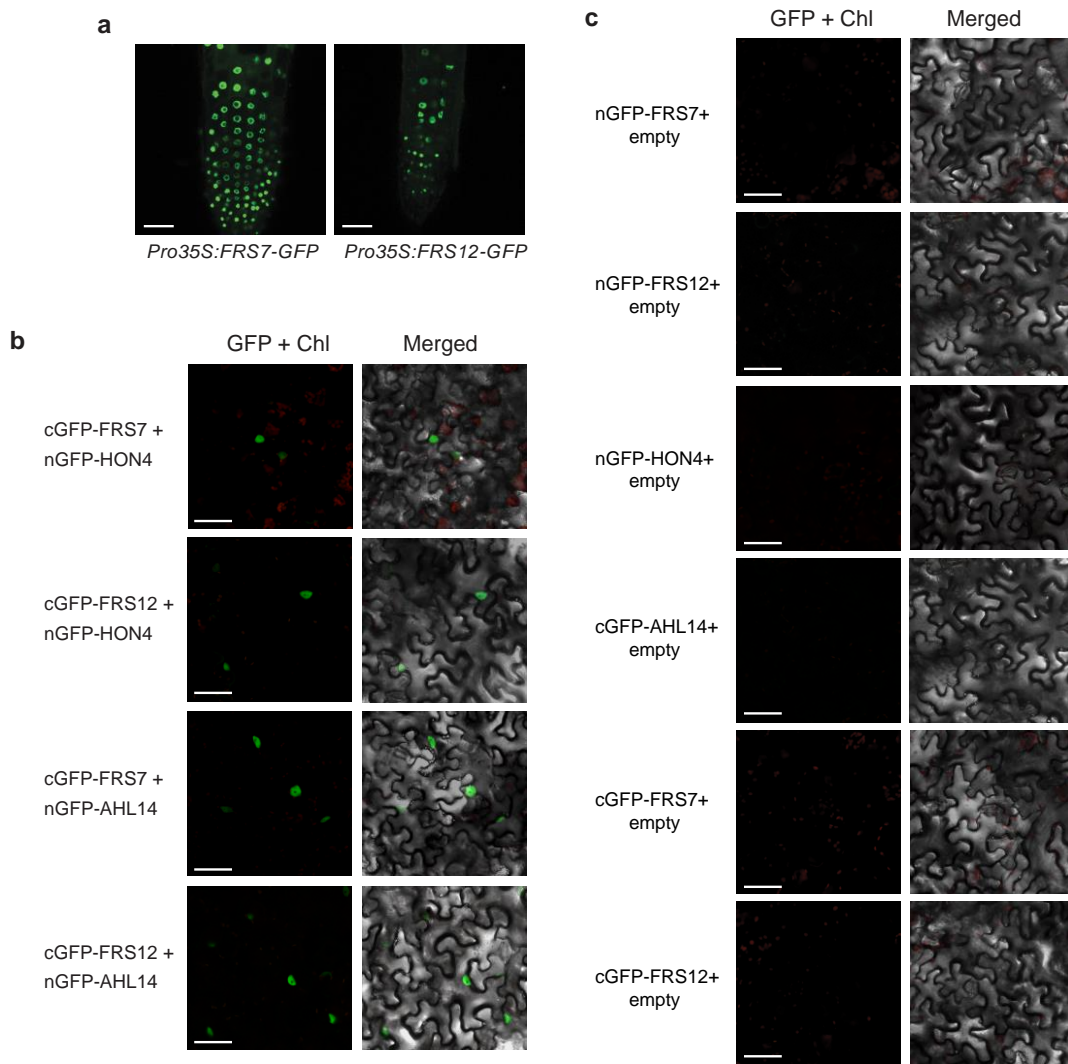

**Supplementary Figure 6. FRS7 and FRS12 are nuclear-localized proteins interacting with HON4 and AHL14.** **a**, Laser confocal microscope images of *Arabidopsis* primary root cells constitutively expressing *FRS7-GFP* (left) and *FRS12-GFP* (right). Scale bars: 30  $\mu\text{m}$ . **b**, BiFC analysis in *N. benthamiana* leaves of FRS7-HON4, FRS12-HON4, FRS7-AHL14 and FRS12-AHL14 nuclear interactions. **c**, Negative BiFC controls of single expressed nGFP-FRS7, nGFP-FRS12, nGFP-HON4, nGFP-AHL14, cGFP-FRS7 and cGFP-FRS12. Scale bars: 50  $\mu\text{m}$ .

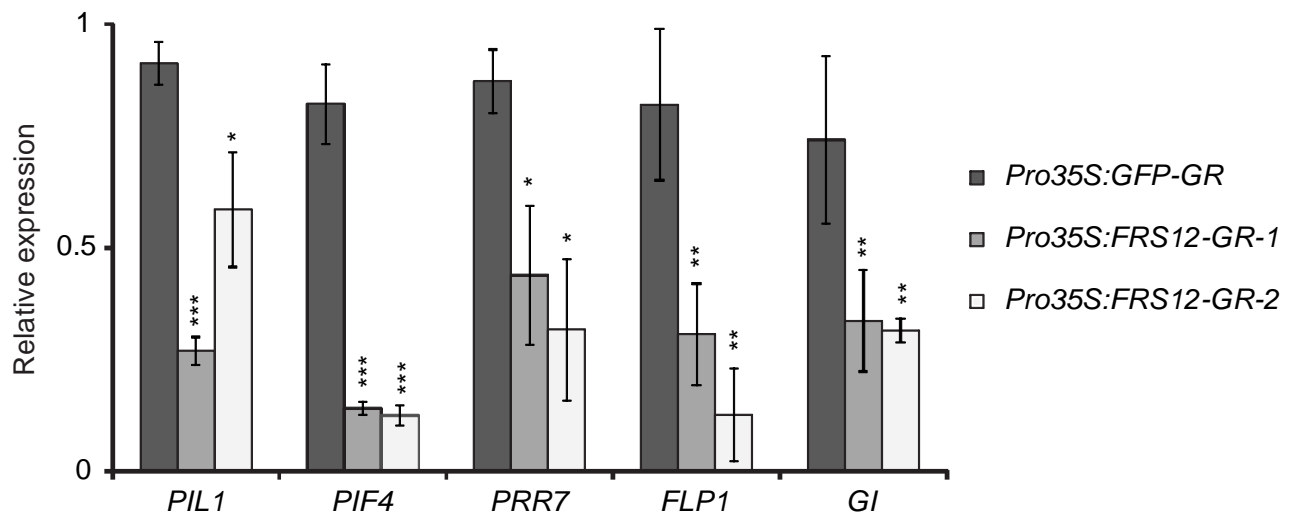

**Supplementary Figure 7. Induced overexpression of *FRS12* represses light and clock-related genes.** *Pro35S:FRS12-GR-1*, *Pro35S:FRS12-GR-2* and *Pro35S:GFP-GR* (control) lines were grown for one week under long-days, then treated with 5  $\mu$ M of DEX and harvested at four hours after treatment (ZT21). Expression values of *PIL1*, *PIF4*, *PRR7*, *FLP1* and *GI* were evaluated and normalized to the expression of *UBC* (AT5G25760) and *PP2A* (At1g13320) as internal expression controls. Values represent the average expression of 3 biological replicates  $\pm$  SEM; \* $P$ <0.05, \*\* $P$ <0.01, t-test.



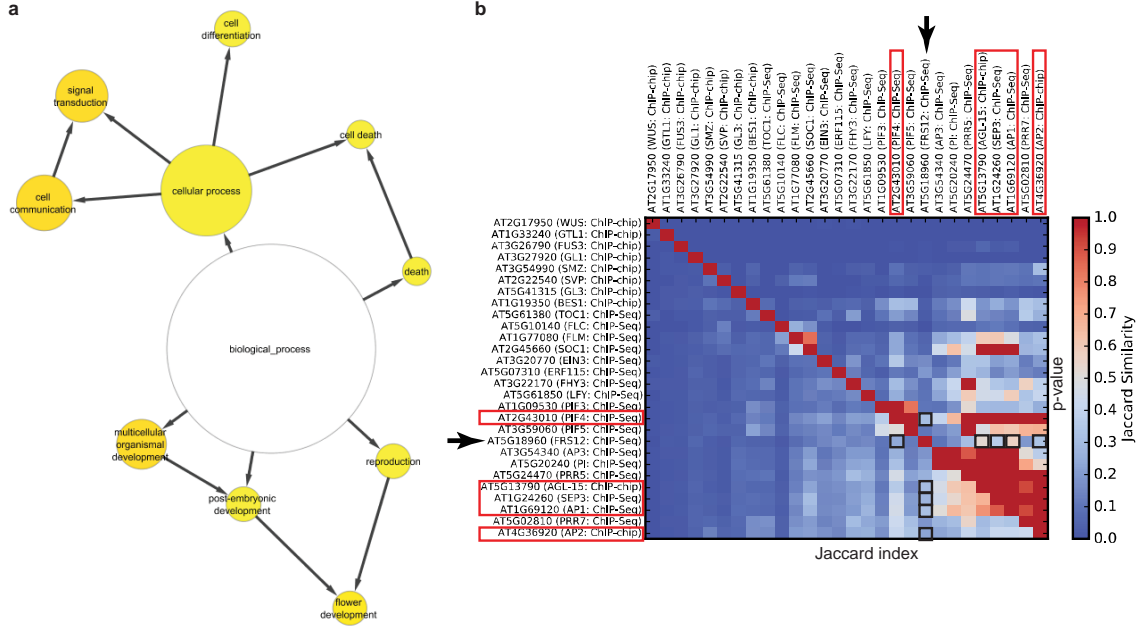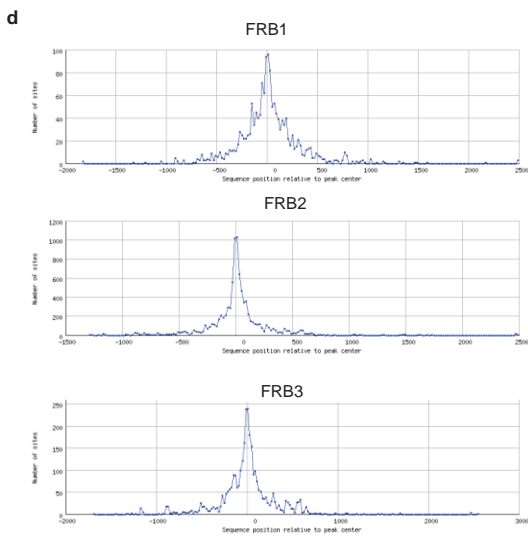

**Supplementary Figure 8. FRS12 binds *in vivo* to genes related to flowering time and diurnal growth pathways.** **a**, GOslim enrichment diagram of the FRS12-HBH TChAP-Seq-bound genes. Node sizes are proportional to the enriched gene number and the yellow color intensity is proportional to the *P*-value significance. **b**, Transcription factor co-binding matrix for common potential target genes created by average-linkage hierarchical clustering based on the Jaccard index. The lower left half displays the Jaccard index, while the upper right half displays hypergeometric *P*-values of overlap between the two sets of bound genes, corrected using the Bonferroni method. Black arrows highlight FRS12 and red rectangles highlight the five TFs presenting the target genes most significantly co-bound to FRS12. **c**, Statistical results highlighting the TFs that share potential target genes with FRS12. Results describe common potential target genes and average-linkage hierarchical clustering analysis based on the Jaccard index. Bold lines highlight the top 5 transcription factors presenting the most significant co-binding values to FRS12. **d**, Distribution of the FRB1, FRB2 and FRB3 motifs in relation to the peak summits.

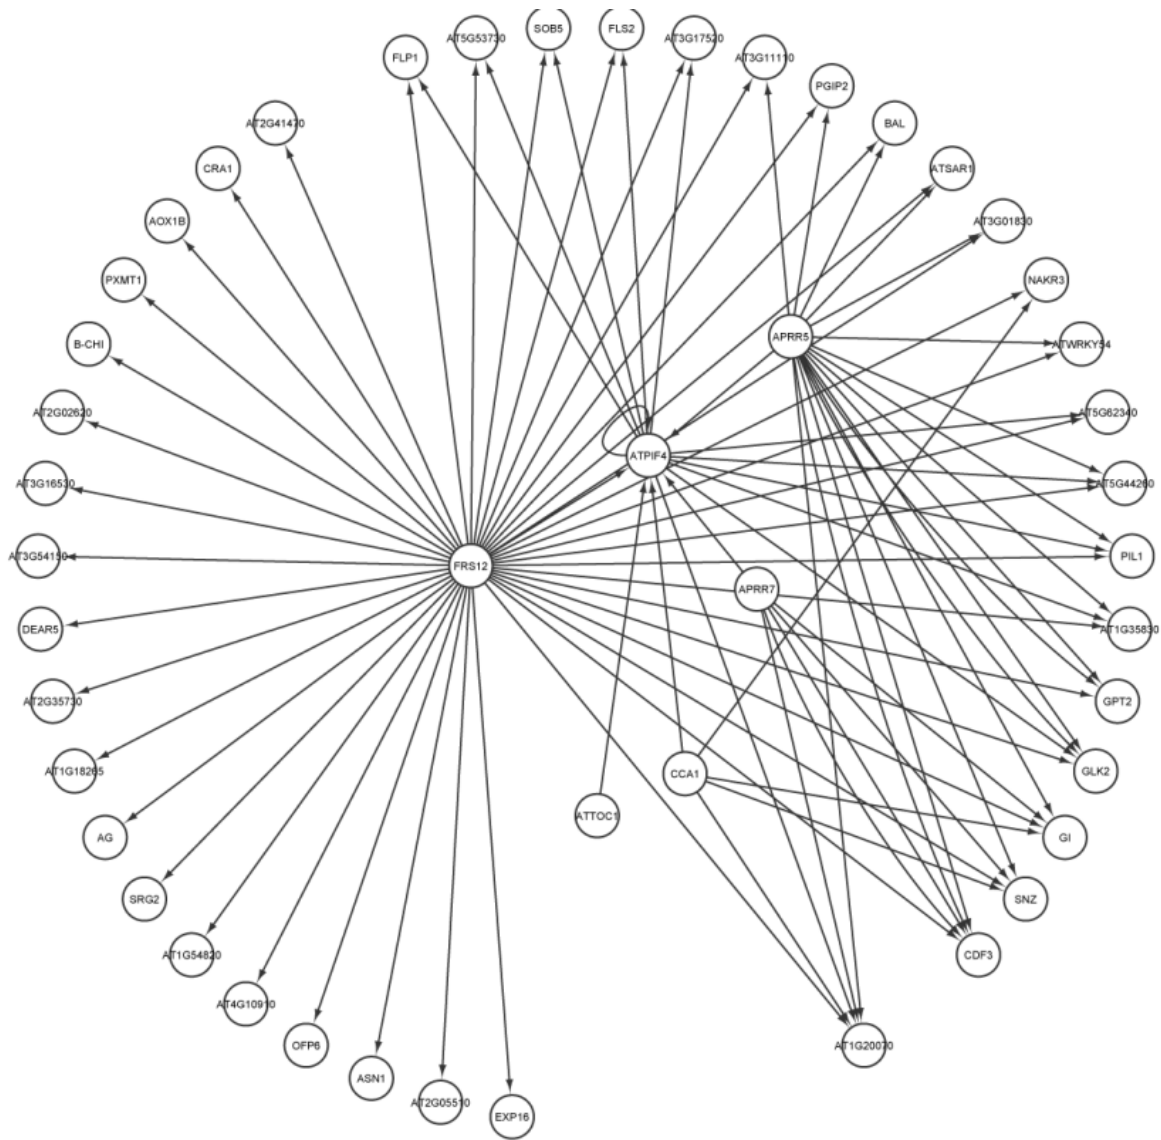

**Supplementary Figure 9. Gene regulatory network of FRS12, PIF4 and circadian clock components.** Circles inside the network and surrounding circles represent transcription factors and targets of (genes bound and regulated) FRS12, respectively. An arrow indicates a regulatory interaction based on ChIP-Seq.

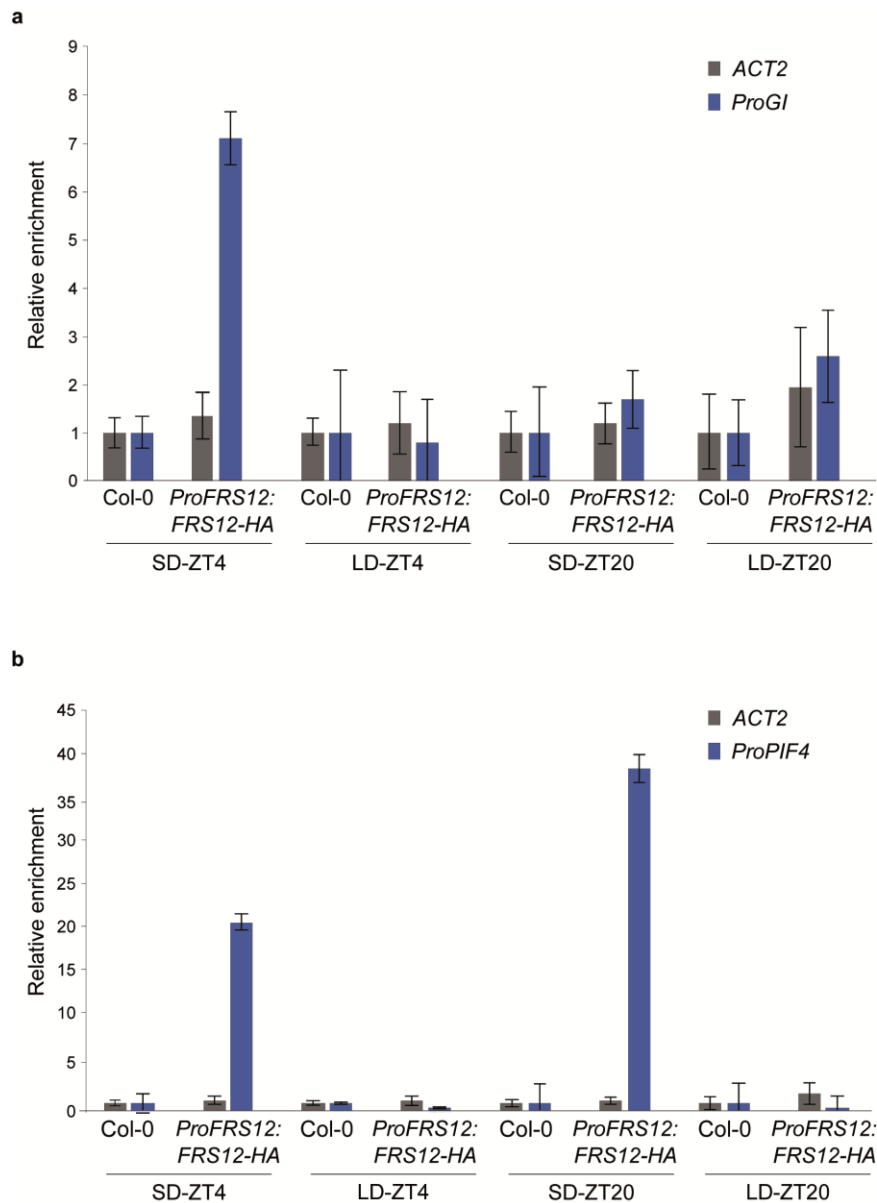

**Supplementary Figure 10. FRS12 binds promoters of genes responsible for diurnal growth and flowering in a photoperiodic-dependent manner.** ChIP-qPCR assay of selected fragments in the *GI* (a) and *PIF4* (b) promoters. The transgenic *Arabidopsis* line *ProFRS12:FRS12-HA* was grown for 10 days in SD and LD and harvested at ZT4 and ZT20 for analysis. Enrichment values were normalized to respective inputs and represented relative to Col-0 wt plants (background control). Values represent the mean of 3 biological replicates  $\pm$  SEM.

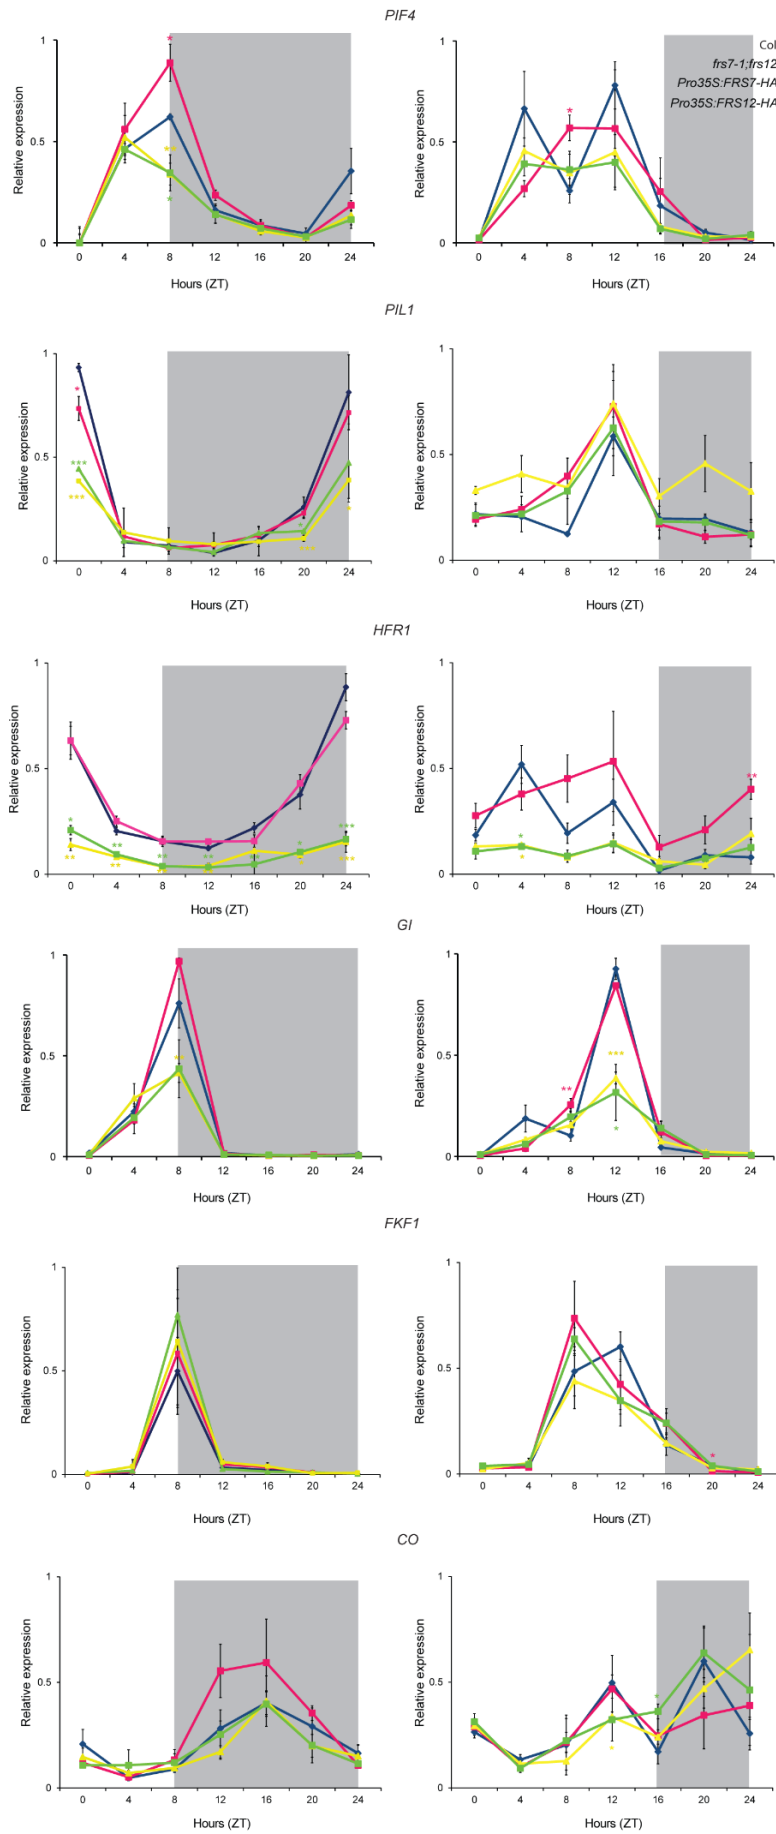

**Supplementary Figure 11. Effect of ectopic expression of *FRS7* and *FRS12* on target genes.** Diurnal oscillations of *PIF4*, *GI*, *PIL1*, *HFR1*, *FKF1* and *CO* transcript levels in Col-0 wt seedlings compared to the double *frs7-1;frs12-1* mutant, and *Pro35S:FRS7-HA-1* and *Pro35S:FRS12-HA-1* overexpressing lines grown under SD (left panels) or LD (right panels). Gray rectangles represent the dark period. Values represent the average expression of 3 biological replicates  $\pm$  SEM; \* $P$ <0.05, \*\* $P$ <0.01, t-test. “1” represents the highest level of expression for a particular gene.

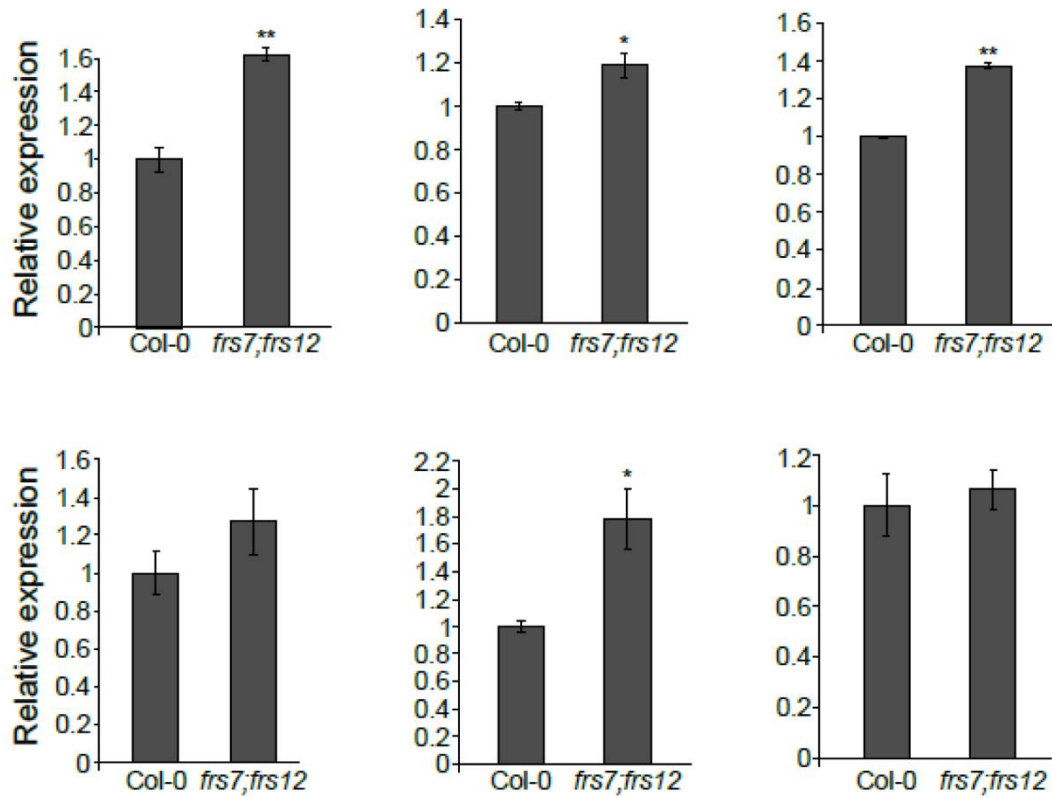

**Supplementary Figure 12. Effects of loss-of-function of *FRS7* and *FRS12* on *PIF4* expression.** *PIF4* transcript levels in the double *frs7-1;frs12-1* mutant compared to Col-0 wt seedlings (set at 1) grown under SD and harvested at ZT8 in 6 independent experiments. Values represent the average expression of 2 to 4 biological replicates  $\pm$  SEM; \* $P$ <0.05, \*\* $P$ <0.01, t-test.

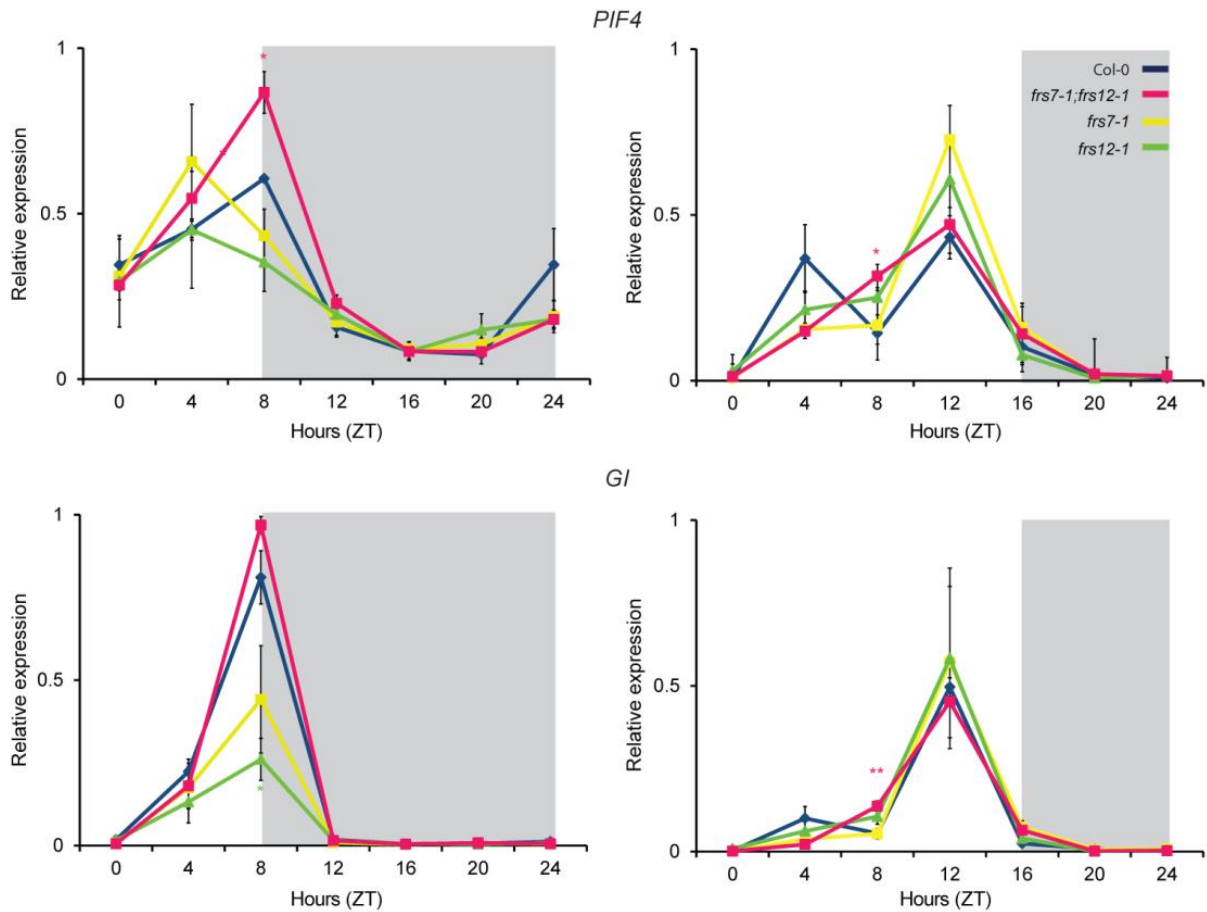

**Supplementary Figure 13. Cooperative functions of FRS7 and FRS12 to repress diurnal growth and photoperiodic flowering pathways.** Diurnal oscillations of *PIF4* and *GI* transcript levels in Col-0 wt seedlings compared to the single *frs7-1* and *frs12-1* and the double *frs7-1;frs12-1* mutants grown under SD (left panels) or LD (right panels). Gray rectangles represent the dark period. Values represent the average expression of 3 biological replicates  $\pm$  SEM; \* $P < 0.05$ , \*\* $P < 0.01$ , t-test. “1” represents the highest level of expression for a particular gene.



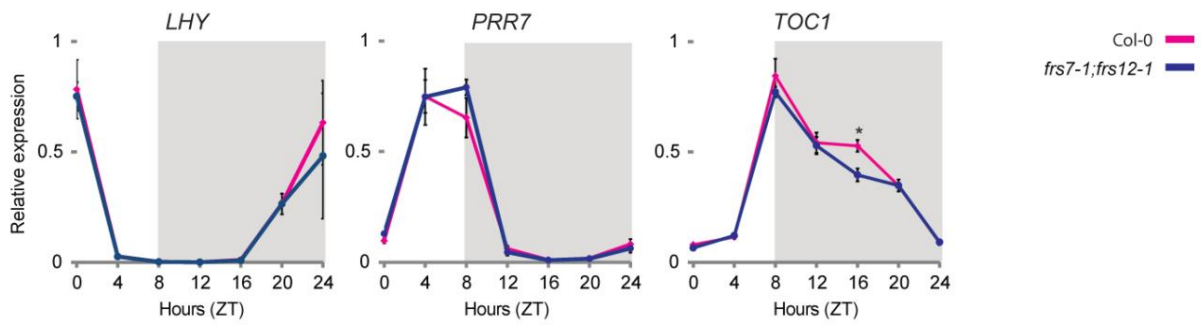

**Supplementary Figure 14. FRS7-FRS12 do not affect the circadian clock functioning.**

Diurnal oscillations of transcript levels of circadian clock genes in Col-0 wt seedlings compared to the double *frs7-1;frs12-1* mutant. Gray rectangles represent the dark period. Values represent the average expression of 3 biological replicates  $\pm$  SEM; \* $P < 0.05$ , \*\* $P < 0.01$ , t-test. “1” represents the highest level of expression for a particular gene.

**Fig.1c**

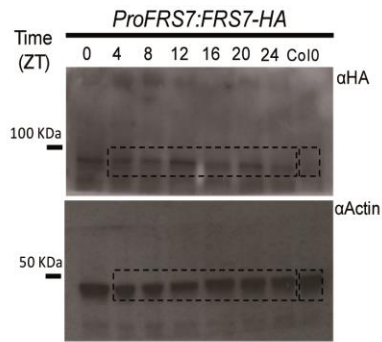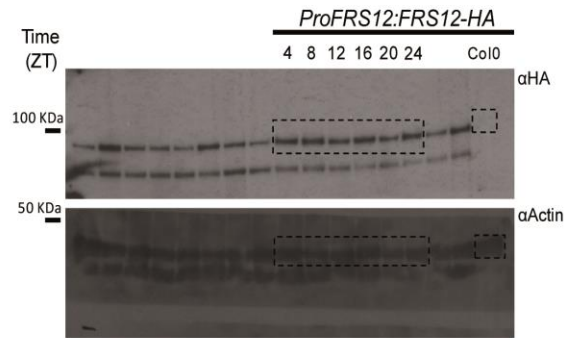

**Fig. 1d**

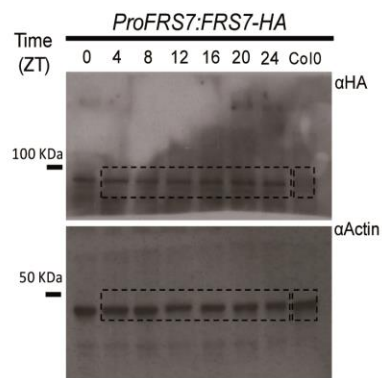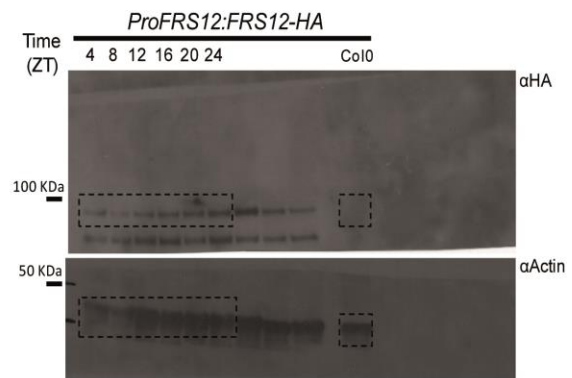

**Fig. 1e**

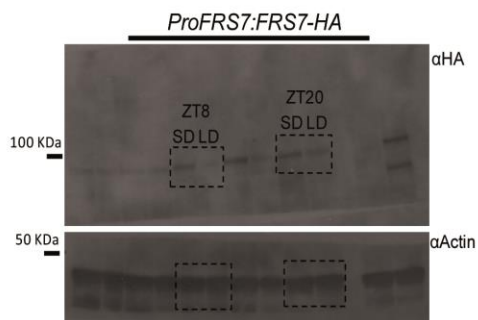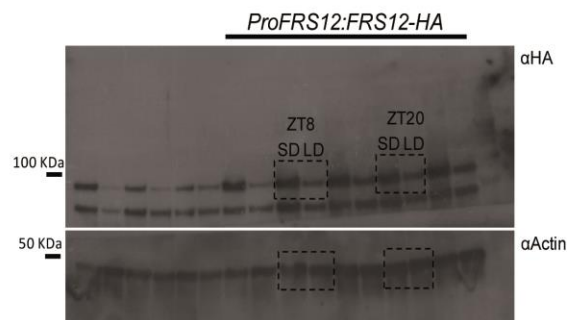

**Supplementary Figure 15. Original images of cropped immunoblot figures shown in Fig 1.**

**Supplementary Table 1. Statistical results of leaf series measurements.**

**a**

| <i>Individual leaf</i>   | <i>Pro35S:FRS7-HA-1</i>   | <i>Pro35S:FRS12-HA-1</i> | <i>frs7-1;frs12-1</i> |
|--------------------------|---------------------------|--------------------------|-----------------------|
| Cot                      | <b>3.29169E-05</b>        | <b>0.001190801</b>       | <b>0.034783184</b>    |
| 1                        | <b>2.06482E-05</b>        | <b>0.029987748</b>       | <b>0.032224747</b>    |
| 2                        | <b>1.70106E-05</b>        | <b>0.023917684</b>       | <b>0.03610006</b>     |
| 3                        | <b>1.16242E-05</b>        | <b>0.016156871</b>       | <b>0.045844491</b>    |
| 4                        | <b>7.2757E-05</b>         | <b>0.014715746</b>       | <b>0.049654893</b>    |
| 5                        | <b>7.88528E-06</b>        | <b>0.012938938</b>       | 0.050967207           |
| 6                        | <b>9.81655E-06</b>        | <b>0.013072534</b>       | 0.050349739           |
| 7                        | <b>1.22625E-05</b>        | <b>0.013686145</b>       | <b>0.04846985</b>     |
| <b>Total area</b>        | Average (mm) <sup>2</sup> | Ratio relative to Col-0  | <i>P</i> -value       |
| <b>Col-0</b>             | 1719.203                  |                          |                       |
| <i>Pro35S:FRS7-HA-1</i>  | 907.929                   | 0.528110409              | <b>0.000103789</b>    |
| <i>Pro35S:FRS12-HA-1</i> | 1259.969                  | 0.732879712              | <b>0.010014974</b>    |
| <i>frs7-1;frs12-1</i>    | 2551.396                  | 1.484057438              | <b>0.013542658</b>    |

**b**

| <i>Individual leaf</i>   | <i>Pro35S:FRS7-HA-1</i>   | <i>Pro35S:FRS12-HA-1</i> | <i>frs7-1;frs12-1</i> |
|--------------------------|---------------------------|--------------------------|-----------------------|
| Cot                      | <b>0.018858458</b>        | <b>0.016404643</b>       | 0.435493988           |
| 1                        | 0.08458914                | <b>0.015431255</b>       | 0.41668861            |
| 2                        | 0.081786723               | <b>0.014564198</b>       | 0.422435475           |
| 3                        | 0.069092989               | <b>0.011941888</b>       | 0.477118875           |
| 4                        | 0.053956106               | <b>0.008552939</b>       | 0.549997227           |
| 5                        | <b>0.039557143</b>        | <b>0.0060756</b>         | 0.583697343           |
| 6                        | <b>0.027829936</b>        | <b>0.005713693</b>       | 0.588139787           |
| 7                        | <b>0.026259078</b>        | <b>0.005446892</b>       | 0.583305215           |
| 8                        | <b>0.031047416</b>        | <b>0.007962883</b>       | 0.549917485           |
| 9                        | <b>0.032586113</b>        | <b>0.009479576</b>       | 0.558391896           |
| 10                       | <b>0.036380884</b>        | <b>0.011764264</b>       | 0.473699644           |
| <b>Total area</b>        | Average (mm) <sup>2</sup> | Ratio relative to Col-0  | <i>P</i> -value       |
| <b>Col-0</b>             | 1719.025                  |                          |                       |
| <i>Pro35S:FRS7-HA-1</i>  | 1254.442                  | 0.729740405              | 0.085297471           |
| <i>Pro35S:FRS12-HA-1</i> | 1207.806                  | 0.702611073              | <b>0.023221389</b>    |
| <i>frs7-1;frs12-1</i>    | 1749.733                  | 1.017863615              | 0.881934952           |

*P*-values (t-test) showing differences in individual leaf areas and in total leaf rosette area between *FRS7* and *FRS12* altered lines and Col-0 wt grown under LD (a) or SD (b) conditions (n=8 plants/genotype).

**Supplementary Table 2. Unique peptides identified in TAP-MS experiments.**

| <b>AGI code</b> | <b>Name</b> | <b>Unique Peptide Sequence</b>         | <b>In TAP experiments</b>  |
|-----------------|-------------|----------------------------------------|----------------------------|
| AT3G04590       | AHL14       | ELAAVTGGTVSTNSGSSK                     | 3, 9                       |
| AT3G04590       | AHL14       | IGHESSENGDYEQQIPD                      | 3, 9                       |
| AT2G45850       | AHL9        | TGNLSVSLASPDGR                         | 9, 10                      |
| AT2G45850       | AHL9        | VIAFSQQGPR                             | 9, 10                      |
| AT5G18960       | FRS12       | ALMVWSLR                               | 5, 6, 9, 10                |
| AT5G18960       | FRS12       | AVTGTEPYA GLEFGSA NEACQFYQA YAEVVGFRVR | 3                          |
| AT5G18960       | FRS12       | DDVWLR                                 | 9                          |
| AT5G18960       | FRS12       | DMESGVSAQDLK                           | 10                         |
| AT5G18960       | FRS12       | EFYNA YAAR                             | 10                         |
| AT5G18960       | FRS12       | EHNHELGGEGSVEETTPR                     | 5, 6, 9, 10                |
| AT5G18960       | FRS12       | EHNHELGGEGSVEETTPRPSR                  | 5, 6, 9                    |
| AT5G18960       | FRS12       | ENLIPFPSEFK                            | 9                          |
| AT5G18960       | FRS12       | FKGGGGEGEVSDDHHQTQAK                   | 9                          |
| AT5G18960       | FRS12       | IFQNELVQS YNYLCLK                      | 9                          |
| AT5G18960       | FRS12       | LGVTVNPHRPK                            | 6, 9                       |
| AT5G18960       | FRS12       | LYTLTVFR                               | 5, 9                       |
| AT5G18960       | FRS12       | QPVLLGCAMVADESK                        | 2, 3, 9, 10                |
| AT5G18960       | FRS12       | YEQALEQR                               | 3, 8, 9, 10                |
| AT5G18960       | FRS12       | YSAWQIR                                | 1, 2, 3, 4, 5, 6, 7, 9, 10 |
| AT3G06250       | FRS7        | DVESGVT SQDLK                          | 4, 7, 8, 9, 10             |
| AT3G06250       | FRS7        | FSAWQIR                                | 9                          |
| AT3G18035       | HON4        | DGVTSENQA VVQAIK                       | 9, 10                      |
| AT3G18035       | HON4        | IGGVISR                                | 7                          |
| AT3G18035       | HON4        | IGTSVTTGTQDSGELK                       | 10                         |
| AT3G18035       | HON4        | SEILHSSNNDPMASGSASQPLK                 | 9                          |
| AT3G18035       | HON4        | SVSSTASVYPYVANGAR                      | 7, 9, 10                   |

**Supplementary Table 3. Genes physically bound and transcriptionally regulated by FRS12.**

| <b>Locus</b>     | <b>Short description</b>                                                  | <b>RNA_Seq Fold Change</b> |
|------------------|---------------------------------------------------------------------------|----------------------------|
| <b>AT4G31380</b> | FPF1-like protein 1 (FLP1)                                                | -23,33                     |
| <b>AT2G43010</b> | Phytochrome interacting factor 4 (PIF4)                                   | -9,64                      |
| <b>AT1G22770</b> | GIGANTEA (GI)                                                             | -5,26                      |
| <b>AT3G55500</b> | Expansin A16 (EXPA16)                                                     | -4,46                      |
| <b>AT2G05510</b> | Glycine-rich protein family                                               | -4,13                      |
| <b>AT2G46970</b> | Phytochrome interacting factor 3-like 1 (PIL1)                            | -4,08                      |
| <b>AT3G11110</b> | RING/U-box superfamily protein                                            | -3,56                      |
| <b>AT3G47340</b> | Glutamine-dependent asparagine synthase 1 (ASN1)                          | -3,53                      |
| <b>AT3G53530</b> | Chloroplast-targeted copper chaperone protein                             | -2,74                      |
| <b>AT1G35830</b> | VQ motif-containing protein                                               | -2,57                      |
| <b>AT5G53730</b> | Late embryogenesis abundant (LEA) hydroxyproline-rich glycoprotein family | -2,56                      |
| <b>AT5G06870</b> | Polygalacturonase inhibiting protein 2 (PGIP2)                            | -2,47                      |
| <b>AT5G44260</b> | Zinc finger C-x8-C-x5-C-x3-H type family protein                          | -2,46                      |
| <b>AT3G52525</b> | Ovate family protein 6 (OFP6)                                             | -2,37                      |
| <b>AT5G08150</b> | SUPPRESSOR OF PHYTOCHROME B 5 (SOB5)                                      | -2,32                      |
| <b>AT5G44190</b> | GOLDEN2-like 2 (GLK2)                                                     | -2,30                      |
| <b>AT5G46330</b> | FLAGELLIN-SENSITIVE 2 (FLS2)                                              | -2,27                      |
| <b>AT1G20070</b> | unknown protein                                                           | -2,21                      |
| <b>AT4G10910</b> | unknown protein                                                           | -2,20                      |
| <b>AT1G54820</b> | Protein kinase superfamily protein                                        | -2,18                      |
| <b>AT3G60140</b> | DARK INDUCIBLE 2 (DIN2)                                                   | -2,12                      |
| <b>AT3G47500</b> | cycling DOF factor 3 (CDF3)                                               | -2,07                      |
| <b>AT4G18960</b> | AGAMOUS (AG)                                                              | -2,07                      |
| <b>AT2G39250</b> | SCHNARCHZAPFEN (SNZ)                                                      | -2,01                      |
| <b>AT1G18265</b> | Protein of unknown function, DUF593                                       | 2,02                       |
| <b>AT2G35730</b> | Heavy metal transport/detoxification superfamily protein                  | 2,14                       |
| <b>AT5G62340</b> | Plant invertase/pectin methylesterase inhibitor superfamily protein       | 2,15                       |
| <b>AT1G09180</b> | secretion-associated RAS superfamily 1 (SARA1A)                           | 2,15                       |
| <b>AT3G17520</b> | Late embryogenesis abundant protein (LEA) family protein                  | 2,19                       |
| <b>AT4G06746</b> | related to AP2 9 (RAP2.9)                                                 | 2,22                       |
| <b>AT2G40750</b> | Member of WRKY Transcription Factor; Group III (WRKY54)                   | 2,25                       |
| <b>AT3G54150</b> | S-adenosyl-L-methionine-dependent methyltransferases superfamily protein  | 2,33                       |
| <b>AT3G01830</b> | Calcium-binding EF-hand family protein                                    | 2,39                       |
| <b>AT2G45760</b> | BON association protein 2 (BAP2)                                          | 2,41                       |
| <b>AT3G16530</b> | Legume lectin family protein                                              | 2,41                       |
| <b>AT2G02620</b> | Cysteine/Histidine-rich C1 domain family protein                          | 2,83                       |
| <b>AT3G12500</b> | basic chitinase (HCHIB)                                                   | 3,06                       |
| <b>AT1G66700</b> | PXMT1                                                                     | 3,56                       |
| <b>AT3G22360</b> | alternative oxidase 1B (AOX1B)                                            | 3,88                       |
| <b>AT1G61800</b> | glucose-6-phosphate/phosphate translocator 2 (GPT2)                       | 6,00                       |
| <b>AT5G44120</b> | CRUCIFERINA (CRA1)                                                        | 11,31                      |
| <b>AT2G41470</b> | unknown protein                                                           | 13,27                      |

**Supplementary Table 4. Primers used in this study.**

| Name | Sequence 5' 3'                                                                                       | Type | Target sequence                                     |
|------|------------------------------------------------------------------------------------------------------|------|-----------------------------------------------------|
| 1209 | ATTGACATCCAATTCGACAGC                                                                                | FW   | SALK_030182.42.45.x<br>( <i>frs12-1</i> genotyping) |
| 1210 | GTTCTTGTGTTTCGTTGGCTTC                                                                               | RV   | SALK_030182.42.45.x<br>( <i>frs12-1</i> genotyping) |
| 669  | ATTTTGCCGATTTCCGAAC                                                                                  | RV   | LBb1.3 SALK T-DNA<br>primer                         |
| 1618 | TGAAACAACCATGAGAAAGCC                                                                                | FW   | LP_FLAG_196C09<br>( <i>frs7-1</i> genotyping)       |
| 1619 | CAACTCTTATGCTACGCGGAC                                                                                | RV   | LP_FLAG_196C09<br>( <i>frs7-1</i> genotyping)       |
| 1621 | CGTGTGCCAGGTGCCACGGAATAGT                                                                            | RV   | FST_LB4 T-DNA<br>primer                             |
| 1124 | GGGGACAAGTTTGTACAAAAAAGCAGGCTCCATGGAGAGTGTAGATACTGAG                                                 | FW   | attB1-FRS12                                         |
| 1125 | GGGGACCACTTTGTACAAGAAAGCTGGGTCTCMTCTCTGCCAACAAAGTTTC                                                 | RV   | attB2-FRS12                                         |
| 1555 | AAGGGATCCGGCGTATCACTAACTCAAAAAACT                                                                    | FW   | FRS12 promoter (-0-<br>585bp) +BamHI                |
| 1556 | GGTCTCGAGTCTCGTCGAAGCGACCACCAAAGA                                                                    | RV   | FRS12 promoter (0-<br>582bp) + XhoI                 |
| 1557 | AAGGGATCCAGACCATGTCTTTGGAAAAG                                                                        | FW   | FRS7 promoter (-800-0)<br>+BamHI                    |
| 1558 | GTGCTCGAGGTTGTTCCACAATTTAAAC                                                                         | RV   | FRS7 promoter (-800-<br>0)+ XhoI                    |
| 2418 | GGGGACAAGTTTGTACAAAAAAGCAGGCTCCTCATGCTCATCTAAGGATGACA                                                | FW   | attB1 -3000bp ProPIF4                               |
| 2748 | GGGGACCACTTTGTACAAGAAAGCTGGGTCCCTCTCCAAATGAAATGAACTT<br>CCTTATATAGAGGAAGGGTCTTGCgtcagatctctggagacatt | RV   | attB2_Min35S_ProPIF4                                |
| 1816 | T CAGATGCAGCCGATGGAGATG                                                                              | FW   | qPCR primer PIF4                                    |
| 1817 | CGACGGTGTGTGACTTTGCTGTCTC                                                                            | RV   | qPCR primer PIF4                                    |
| 1818 | T CGTGGTGCCTTCGTGTGTTTC                                                                              | FW   | qPCR primer PIL1                                    |
| 1819 | CGGACGCAGACTTTGGGAATTG                                                                               | RV   | qPCR primer PIL1                                    |
| 1806 | ACTCTACACGGTTTCCTTATCCT                                                                              | FW   | qPCR primer FLP1                                    |
| 1807 | AATACCCACACACCAGACATTG                                                                               | RV   | qPCR primer FLP1                                    |
| 1808 | GTGTTGACTGTATGTGTTAG                                                                                 | FW   | qPCR primer GI                                      |
| 1809 | GTTAGCAGTTTGATTGTTAGA                                                                                | RV   | qPCR primer GI                                      |
| 1810 | ATCATAATAATCATGCCTCCTAT                                                                              | FW   | qPCR primer PRR7                                    |
| 1811 | TTGTTGTTACCTTCAATCGT                                                                                 | RV   | qPCR primer PRR7                                    |
| 2224 | TCATCTCCGATATCTCTTAACTAACA                                                                           | FW   | qPCR primer HFR1                                    |
| 2225 | TAGACGATCTTCATCACTTCTTGC                                                                             | RV   | qPCR primer HFR1                                    |
| 3067 | GTTGTACCGCTCCAAGACT                                                                                  | FW   | qPCR primer FKF1                                    |
| 3068 | AGATGATGACCCTACCACACG                                                                                | RV   | qPCR primer FKF1                                    |
| 1753 | CAATGGTTCATTAACCATAACGCATA                                                                           | FW   | qPCR primer CO                                      |
| 1754 | CTTATCTCTGCATATGCCTTCCTCGAA                                                                          | RV   | qPCR primer CO                                      |
| 2686 | GAGCTTGGCAACGAATTGAAGAAC                                                                             | FW   | qPCR primer LHY                                     |
| 2687 | AAAGCTTGGCAAACAGGGATGC                                                                               | RV   | qPCR primer LHY                                     |
| 2690 | TTAGGTCCACCAACCCACAGAGAG                                                                             | FW   | qPCR primer TOC1                                    |
| 2691 | AGGAGCAGTAGCAACAGACCACTC                                                                             | RV   | qPCR primer TOC1                                    |
| 1082 | CTGCGACTCAGGGAATCTTCTAA                                                                              | FW   | qPCR primer UBC                                     |
| 1083 | TTGTGCCATTGAATTGAACCC                                                                                | RV   | qPCR primer UBC                                     |
| 1084 | TAAAGTGGCCAAAATGATGC                                                                                 | FW   | qPCR primer PP2A                                    |
| 1085 | GTTCTCCACAACCGCTTGGT                                                                                 | RV   | qPCR primer PP2A                                    |

|      |                                                      |    |                           |
|------|------------------------------------------------------|----|---------------------------|
| 2746 | TTGACTACGAGCAGGAGATGG                                | FW | qPCR primer ACT2          |
| 2747 | ACAAACGAGGGCTGGAACAAG                                | RV | qPCR primer ACT2          |
| 2732 | GAGCATTGAACTCGGATAA                                  | FW | ProPIF4_region2_ChIP-qPCR |
| 2733 | GATTTGAGGGTGTTTTTGTCT                                | RV | ProPIF4_region2_ChIP-qPCR |
| 2777 | GACCAAAACAAATCCTCCA                                  | FW | ProPil1_FRB23-ChIP-qPCR   |
| 2778 | GATTCGGACTTCACACTT                                   | RV | ProPil1_FRB23-ChIP-qPCR   |
| 2720 | GTAGAGACAAGTGGTAAGA                                  | FW | ProGI_FRB1_ChIP-qPCR      |
| 2721 | TTGTAGATAAACGGGCAG                                   | RV | ProGI_FRB1_ChIP-qPCR      |
|      | CCATGGTTAATTAAGACGTGCGAACCGCAACGTTGAAGGAGC           | Fw | NptII-F                   |
|      | AAACACTGATAGTTAAACGATCTAGTAACATAGATGACACCGCGC        | Rv | NptII-R                   |
|      | GGGGACAAGTTTGTACAAAAAAGCAGGCTTACTTTTTTCTTCTTCTCGTTC  | FW | attB1_AtU6gRNA            |
|      | ATACAG                                               |    |                           |
|      | GGGGACAAGTTTGTATACAAAAGTTGTGTCTAGAAAAAAGCACCGACTCGG  | RV | attB5r_AtU6gRNA           |
|      | GGGGACAAGTTTGTATACAAAAGTTGTACTTTTTTCTTCTTCTCGTTCATAC | FW | attB5_AtU6gRNA            |
|      | AG                                                   |    |                           |
|      | GGGGACCAGTTTGTACAAGAAAGCTGGGTCTAGAAAAAAGCACCGACTCG   | RV | attB2_AtU6gRNA            |
|      | G                                                    |    |                           |
|      | AGTCTGCGACTGAGCCTTTCGTTTTATTTGATGCC                  | FW | noBbsI_F                  |
|      | CTCAGTCGCAAGACTGGGCCTTTCGTTTTATCTG                   | RV | noBbsI_R                  |
| 2644 | ATIGTAGGAGCTGGAGCTCTCGA                              | FW | FRS12 gRNA 14             |
| 2645 | AAACTCGAGAGCTCCAGCTCCTA                              | RV | FRS12 gRNA 14             |
| 2646 | ATTAGCACAACCATGACCTTGG                               | FW | FRS7 gRNA 196             |
| 2647 | AAACCCAAGGTATGGTTGTGCT                               | RV | FRS7 gRNA 196             |
| 2970 | TGGTACGGTTTCGTCTAGGAG                                | FW | FRS12-14 TIDE             |
| 2971 | ACCAGCGTCATCTTCTTCC                                  | RV | FRS12-14 TIDE             |
| 3115 | TGTTTTCTGTGTCCAAGAATGTG                              | FW | FRS7 TIDE                 |
| 3116 | AACCCTGCATACGGTTCAGT                                 | RV | FRS7 TIDE                 |
| 3075 | TCCCTCATCAGATCCACCTC                                 | FW | Cas9 genotyping           |
| 3076 | CTGAAACCTGAGCCTTCTGG                                 | RV | Cas9 genotyping           |
| 2968 | CGGACGGGTTTTAAGGTTAG                                 | FW | RFLP primer FRS7 3-11     |
|      |                                                      |    | BsaJI                     |
| 3117 | TGCCCATCACTATCTTCAGC                                 | RV | RFLP primer FRS7 3-11     |
|      |                                                      |    | BsaJI                     |
| 3118 | AACCATGAGCTTGGAGGTGA                                 | FW | RFLP primer FRS12 3-11    |
|      |                                                      |    | Hpy188III                 |
| 3119 | GATGTGATCGAACCGTCAAC                                 | RV | RFLP primer FRS12 3-11    |
|      |                                                      |    | Hpy188III                 |

**Supplementary Table 5. Plasmids used in this study.**

| <b>Code</b>  | <b>Vector</b>  | <b>Insert</b>            |
|--------------|----------------|--------------------------|
| <b>Z2066</b> | pENTR223.1-Sfi | FRS7                     |
| <b>Z2399</b> | pDONR207       | FRS7 (NO STOP)           |
| <b>Z2593</b> | pFAST-R05      | FRS7(NO STOP)            |
| <b>Z3174</b> | pDONR207       | FRS7 (STOP)              |
| <b>Z3203</b> | pENL4R1        | ProFRS7 (0-800bp)        |
| <b>Z3214</b> | pK8m34GW -FAST | 35S:FRS7-3HA             |
| <b>Z3222</b> | pmK7S*NFm14GW  | ProFRS7 (0-800bp)        |
| <b>Z3437</b> | pK8m34-Fast    | ProFRS7:FRS7-3HA         |
| <b>Z4073</b> | pm42GW7        | ProFRS7:LUC              |
| <b>Z3616</b> | pH7m24GW 2     | Pro35S:nGFP-FRS7         |
| <b>Z3624</b> | pK7m24GW 2     | Pro35S:cGFP-FRS7         |
| <b>Z2028</b> | pDONR207       | FRS12 (STOP)             |
| <b>Z2050</b> | pDONR207       | FRS12 (NO STOP)          |
| <b>Z2054</b> | pK7m34GW       | FRS12 (NO STOP)          |
| <b>Z2161</b> | pK7m34GW       | Pro35S:FRS12-GR          |
| <b>Z2587</b> | pFAST-R05      | FRS12                    |
| <b>Z3205</b> | pENL4R1        | ProFRS12 (0-585bp)       |
| <b>Z3215</b> | pK8m34GW -FAST | 35S:FRS12-3HA            |
| <b>Z3615</b> | pH7m24GW 2     | Pro35S:nGFP-FRS12        |
| <b>Z3623</b> | pK7m24GW 2     | Pro35S:cGFP-FRS12        |
| <b>Z3224</b> | pmK7S*NFm14GW  | ProFRS12(0-585)          |
| <b>Z3439</b> | pK8m34-Fast    | ProFRS12:FRS12:3HA       |
| <b>Z4074</b> | pm42GW7        | ProFRS12:LUC             |
| <b>Z2891</b> | pENTR223.1-Sfi | HON4 (STOP)              |
| <b>Z2888</b> | pENTR223.1-Sfi | AHL14 (STOP)             |
| <b>Z3691</b> | pK7m24GW 2     | Pro35S:cGFP-HON4 (STOP)  |
| <b>Z3695</b> | pK7m24GW 2     | Pro35S:cGFP-AHL14 (STOP) |
| <b>Z4274</b> | pDONR207       | min35S-ProPIF4 (-3000bp) |
| <b>Z4276</b> | pGWLUC         | min35S-ProPIF4 (-3000bp) |
| <b>Z3928</b> | pDONR207       | ProGI (-2500bp)          |
| <b>Z3974</b> | pGWLUC         | ProGI (-2500bp)          |
| <b>Z4129</b> | pMR217         | FRS12-14                 |
| <b>Z4130</b> | pMR218         | FRS7-196                 |
| <b>Z4189</b> | pDE-Cas9-Km    | FRS7+12                  |



**Supplementary Table 6. Information about total read counts and mapped reads in the TChAP-Seq experiment.**

| <b>Library</b>                                  | <b>Total reads</b> | <b>QC Filtered reads</b> | <b>Mapped reads</b> |
|-------------------------------------------------|--------------------|--------------------------|---------------------|
| <b>IC-2032_FRS12_HBH_N1_lib36166_2072_7_1</b>   | 13786144           | 8663414                  | 8663359             |
| <b>IC-2032_FRS12_HBH_N2_lib36167_2072_7_1</b>   | 17012434           | 11655407                 | 11655362            |
| <b>IC-2043_NLS_GFP_HBH_N2_lib41958_2328_8_1</b> | 9305516            | 2151726                  | 2151701             |

**Supplementary Table 7. CRISPR-OR sgRNA parameters.**

| Gene         | guide sequence + <i>PAM</i> | Specificity <sup>1</sup> | Efficiency <sup>2</sup> |
|--------------|-----------------------------|--------------------------|-------------------------|
| <i>FRS7</i>  | GAGCACAACCATGACCTTGGAGG     | 97                       | 92                      |
| <i>FRS12</i> | GTAGGAGCTGGAGCTCTCGAAGG     | 99                       | 86                      |

<sup>1</sup>Specificity score according to Lei et al., 2014<sup>45</sup> (0-100).

<sup>2</sup>Efficiency scores according to Chari et al., 2015<sup>46</sup> (0-100).
